# Supplementary material for: QTL Epistasis Plays a Role of Homeostasis on Heading Date in Rice
Source: Preprints.org preprint supplement (doi:10.20944/preprints202306.1799.v1), 2023-06-26
Supplement: Supplementary file 1 [file supplementary]

Figure S1 The effect changes of 4 QTLs under different background QTLs. Background QTLs mean the QTLs combined with the target QTL. For instance, *Ehd1-1* is the target QTL, *OsMADS50-1* is the background QTL in the combination of *Ehd1-1/OsMADS50-1,* while *Hd3a-1* is the background QTL in the combination of *Ehd1-1/Hd3a-1.*
